# Supplementary material for: Intensive grassland management and drought amplify pathways of energy flux in soil food webs
Source: Research Square preprint supplement (doi:10.21203/rs.3.rs-5965582/v1), 2025-02-14
Supplement: Supplementary file 1 [file a76fad30178b2c0c7b656266.pdf]

## SUPPLEMENTARY INFORMATION

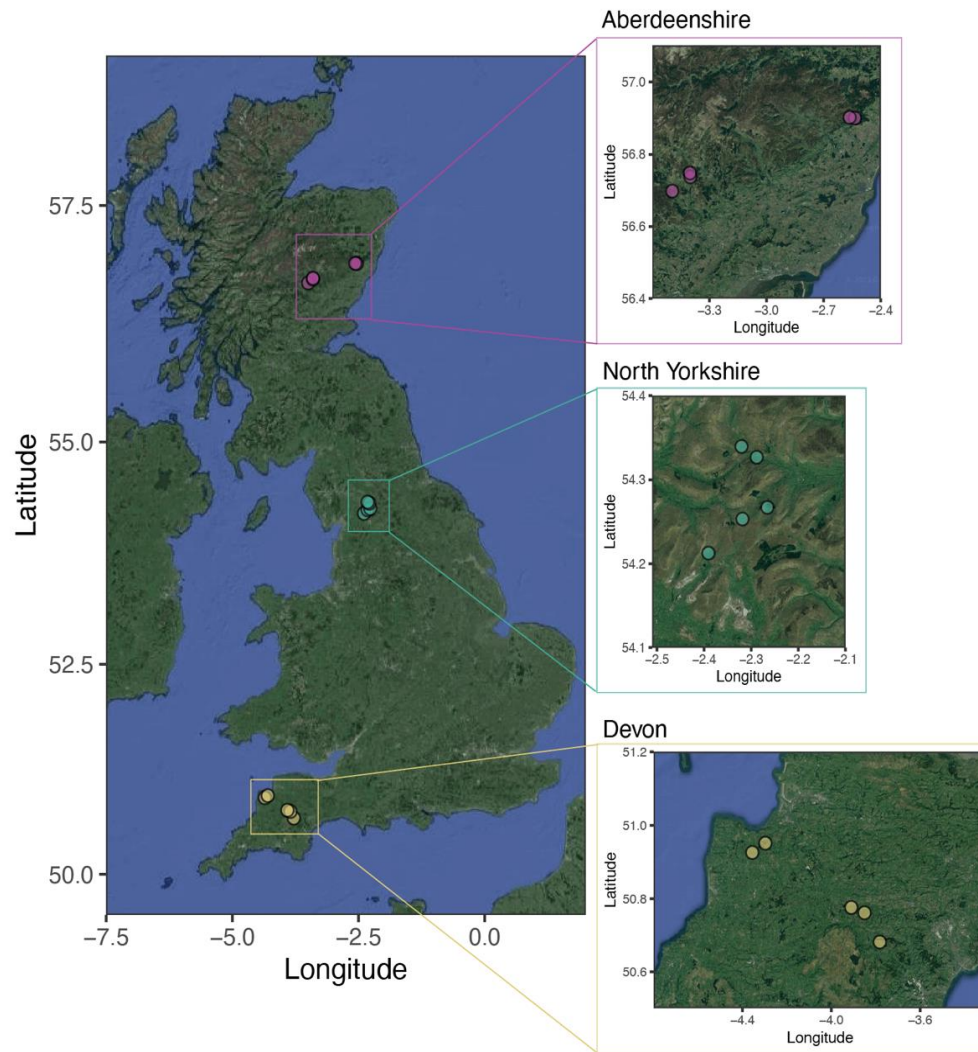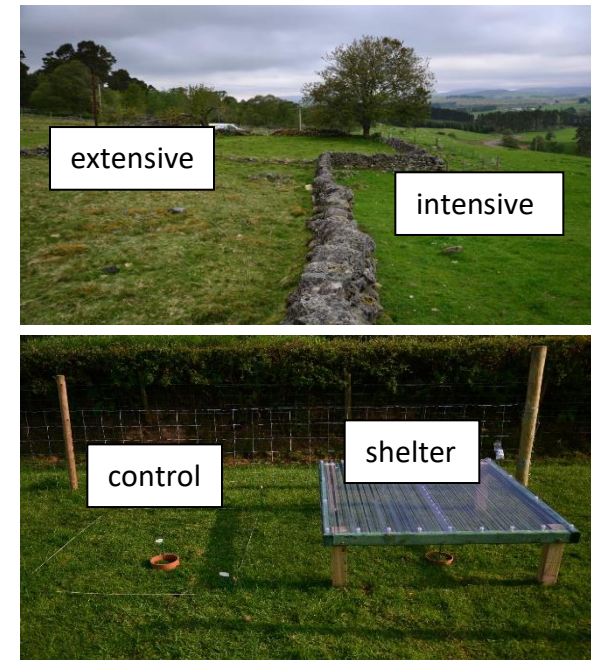

**Figure S1.** Experimental locations in Devon, North Yorkshire, Aberdeenshire (UK). Each point represents one site, and within each site there were two paired fields with contrasting management (extensive, intensive), resulting in a total of 30 fields. In each fields, there were three drought and three control plots, for a total of 60 experimental units resulting from averaging the data of the three plots per condition (drought vs control) in each field. Modified from Lavalée et al 2023.

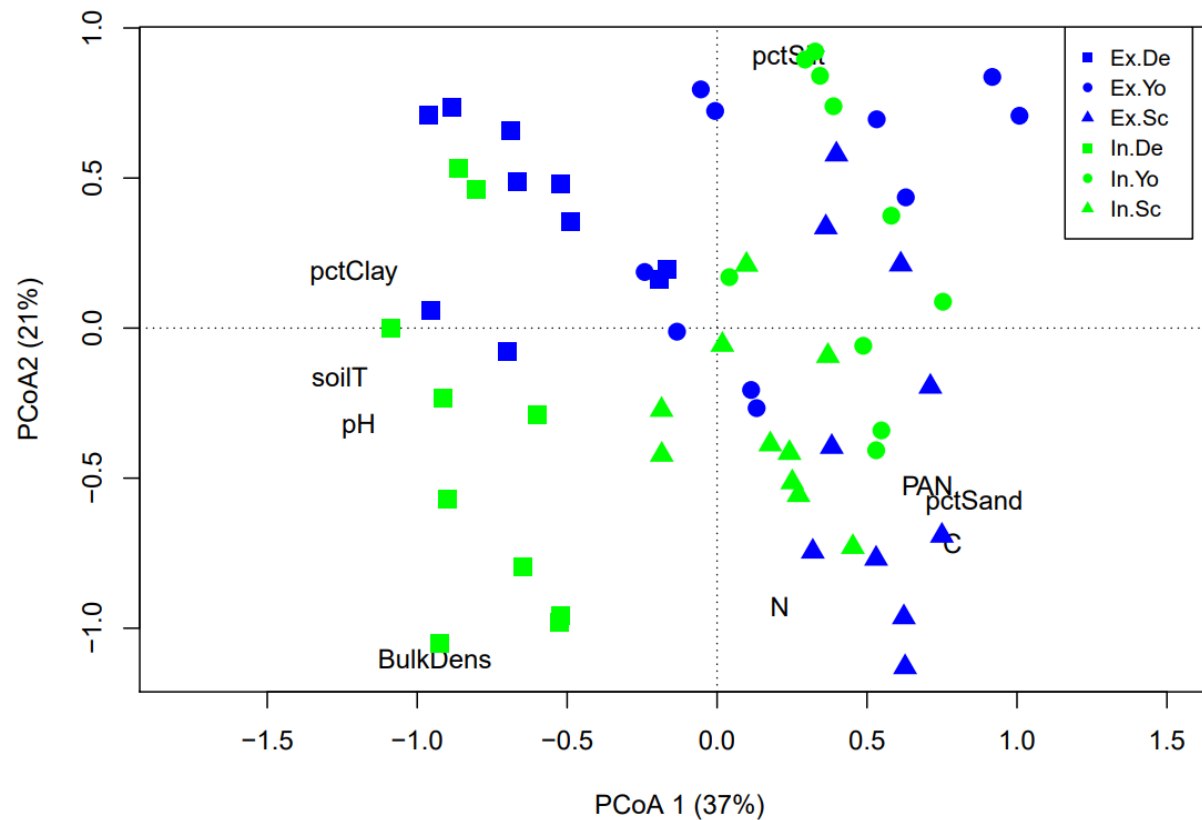

**Figure S2.** PCoA of the correlation matrix of soil variables across all experimental sites. Observational units are labelled by region (De, Yo and Sc respectively for Devon, Yoirkshire and Aberdeenshire, as per figure S1) and intensive vs extensive management. The actual degree of management intensity varied between sites, as reflected by the variables in the ordination but, overall, it is clear that intensively managed field in the south (e.g. green squares for intensive fields in Devon) were characterized by high pH and Bulk density, finer textures, and lower amount of organic matter. The more extensively managed soil in the north (blue circles and triangle in Yorkshire and Aberdeenshire) had opposite characteristics. Axes 1 and 2 are both necessary to describe the variation in soil from north to south as well as from intensive and extensive management regimes. Axis 3, however, also contained variance explainable in terms of intensive

vs extensive soil properties, as show below in figure S3. Axis 1 and 2 were thus combined in a composite variable for the SEM of Figure 4 in the main article so to account for major soil properties gradients that were responsive to intensive management.

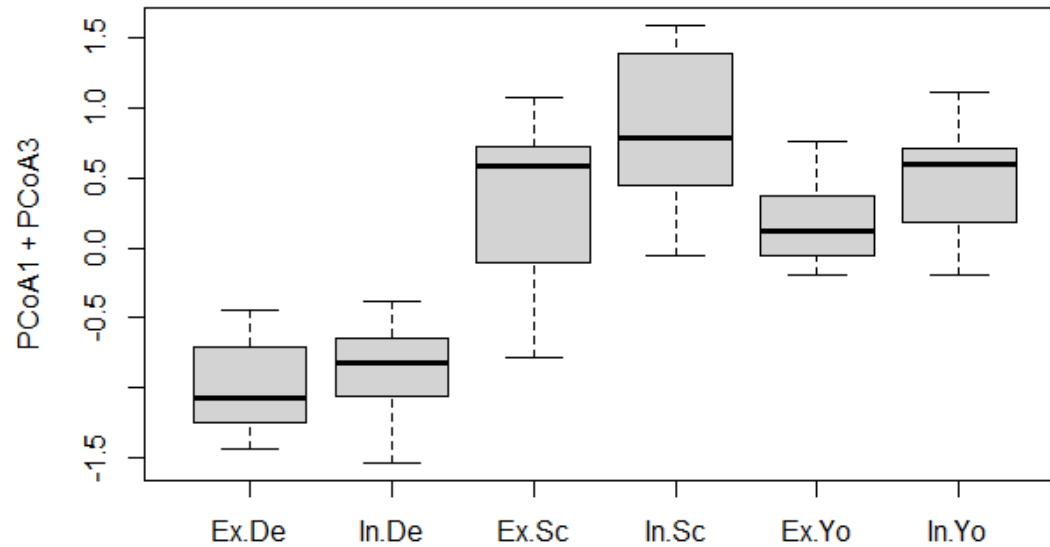

**Figure S3.** Composite variable of PCoA1 and PCoA3 of the ordination of figure S2. The variable clearly respond to intensive management in a similar manner across the three regions, with higher values in intensive field. An inspection of the eigenvectors revealed that intensively managed fields with high values for the composite had higher bulk density and pH as well as higher N and PAN than less intensively managed soil. That is just a general, average trend, as shown by the width of the box and whiskers in the plot.

## Supplemental Description of soil food web data

**Table S1.** Biomasses of the 13 trophic species in which soil organisms have been functionally grouped to measure energy fluxes in the soil food web. Units are in mg m<sup>-2</sup> (at a soil sampling depth of 10cm). The biomass of soil animals was estimated by multiplying population densities (estimated directly) by the average mean body mass of a random samples of 20 individual per trophic groups for each site-plot combination. The body mass of each group of soil animal was estimated using allometric equations available in the references cited in the main article (Caruso & Migliorini, 2009; Turnbull et al., 2014). The biomass of fungi and bacteria was estimated using PLFAs as well as fumigation to estimate microbial C. For PLFA, we used the methods detailed in (Chomel et al., 2019). The biomass of roots was measured directly. There are not many reference to which compare our estimates directly but the values of our estimates are consistent with estimates from similar systems and, in general, the ratios usually found between various taxa (e.g. Andrés et al., 2016; Potapov et al., 2019; Van Den Hoogen et al., 2019). The first row of this table is used as example to illustrate the computer codes we use to estimate energy fluxes, fit the network model, and estimate the network entropy as well as the Jacobian matrix to calculate stability metrics analysed in the paper (Moore, J. C., & de Ruiter, P. C., 2012).

| Location   | Site | Manag.    | Shelter | Pred.<br>mites | Pred.<br>nematodes | Collembolans | Oribatids | D<br>Microart. | PF<br>insects | PP<br>nem | OMN<br>Nem | F<br>Nem | B<br>Nem | Fungi  | Bacteria | Roots   |
|------------|------|-----------|---------|----------------|--------------------|--------------|-----------|----------------|---------------|-----------|------------|----------|----------|--------|----------|---------|
| Devon      | S1   | Extensive | Yes     | 344            | 259                | 687          | 633       | 42             | 12            | 1283      | 811        | 13       | 1045     | 217798 | 66579    | 2246877 |
| Devon      | S1   | Extensive | No      | 460            | 167                | 468          | 377       | 342            | 7             | 1888      | 702        | 19       | 1089     | 235959 | 63732    | 2473955 |
| Devon      | S1   | Intensive | Yes     | 145            | 139                | 472          | 75        | 12             | 26            | 1381      | 451        | 34       | 1189     | 118640 | 80431    | 2414198 |
| Devon      | S1   | Intensive | No      | 490            | 148                | 404          | 73        | 24             | 46            | 2057      | 253        | 66       | 2280     | 126234 | 80609    | 2306635 |
| Devon      | S2   | Extensive | Yes     | 331            | 190                | 968          | 397       | 65             | 13            | 2620      | 1293       | 72       | 1353     | 190118 | 77899    | 4015696 |
| Devon      | S2   | Extensive | No      | 504            | 197                | 916          | 305       | 806            | 95            | 1659      | 169        | 51       | 824      | 272310 | 91851    | 4529609 |
| Devon      | S2   | Intensive | Yes     | 266            | 98                 | 850          | 194       | 17             | 78            | 2003      | 578        | 90       | 1880     | 156491 | 89947    | 4326434 |
| Devon      | S2   | Intensive | No      | 187            | 91                 | 344          | 349       | 12             | 102           | 1582      | 555        | 34       | 1319     | 161136 | 84456    | 4350337 |
| Devon      | S3   | Extensive | Yes     | 254            | 110                | 953          | 194       | 38             | 63            | 2870      | 998        | 101      | 2292     | 265610 | 88452    | 2605422 |
| Devon      | S3   | Extensive | No      | 516            | 88                 | 829          | 126       | 293            | 70            | 2965      | 470        | 63       | 2007     | 200315 | 80439    | 2151266 |
| Devon      | S3   | Intensive | Yes     | 236            | 158                | 1349         | 78        | 6              | 96            | 4757      | 1146       | 73       | 2540     | 106139 | 78121    | 2031751 |
| Devon      | S3   | Intensive | No      | 310            | 208                | 608          | 66        | 8              | 57            | 6266      | 2814       | 58       | 3202     | 134091 | 91289    | 2916160 |
| Devon      | S4   | Extensive | Yes     | 158            | 147                | 352          | 420       | 17             | 16            | 2607      | 498        | 85       | 2305     | 207135 | 71536    | 2784694 |
| Devon      | S4   | Extensive | No      | 385            | 150                | 488          | 286       | 363            | 66            | 2832      | 878        | 71       | 2427     | 208897 | 84765    | 1936139 |
| Devon      | S4   | Intensive | Yes     | 156            | 138                | 527          | 117       | 5              | 43            | 1992      | 1078       | 51       | 1591     | 132475 | 78595    | 4087405 |
| Devon      | S4   | Intensive | No      | 224            | 143                | 269          | 163       | 4              | 47            | 2538      | 1320       | 93       | 2022     | 144432 | 96250    | 4649124 |
| Devon      | S5   | Extensive | Yes     | 106            | 109                | 1612         | 556       | 20             | 57            | 1641      | 429        | 42       | 978      | 149205 | 92032    | 1709061 |
| Devon      | S5   | Extensive | No      | 277            | 58                 | 862          | 388       | 220            | 46            | 972       | 625        | 15       | 1131     | 158248 | 88198    | 2832500 |
| Devon      | S5   | Intensive | Yes     | 81             | 73                 | 142          | 53        | 9              | 50            | 974       | 1292       | 96       | 1120     | 113089 | 70717    | 1756867 |
| Devon      | S5   | Intensive | No      | 355            | 51                 | 223          | 156       | 9              | 166           | 582       | 441        | 112      | 1555     | 107145 | 83346    | 2533713 |
| Aberdeens. | S1   | Extensive | Yes     | 43             | 74                 | 332          | 64        | 14             | 19            | 1799      | 726        | 51       | 1248     | 128730 | 43938    | 1912236 |

|            |    |           |     |     |     |      |      |      |     |      |      |     |      |        |        |         |
|------------|----|-----------|-----|-----|-----|------|------|------|-----|------|------|-----|------|--------|--------|---------|
| Aberdeens. | S1 | Extensive | No  | 92  | 28  | 364  | 58   | 14   | 11  | 2739 | 313  | 53  | 1057 | 152138 | 44957  | 1960042 |
| Aberdeens. | S1 | Intensive | Yes | 89  | 76  | 319  | 55   | 7    | 0   | 2022 | 754  | 83  | 1701 | 90750  | 70550  | 340617  |
| Aberdeens. | S1 | Intensive | No  | 67  | 129 | 229  | 138  | 29   | 0   | 3122 | 793  | 65  | 1402 | 101686 | 60127  | 1278808 |
| Aberdeens. | S2 | Extensive | Yes | 36  | 64  | 372  | 155  | 29   | 12  | 1780 | 760  | 56  | 744  | 232239 | 72067  | 1732964 |
| Aberdeens. | S2 | Extensive | No  | 29  | 28  | 166  | 47   | 11   | 4   | 1859 | 405  | 38  | 580  | 211362 | 78993  | 1876382 |
| Aberdeens. | S2 | Intensive | Yes | 353 | 61  | 272  | 49   | 6    | 1   | 1625 | 610  | 33  | 1383 | 116527 | 71509  | 1577595 |
| Aberdeens. | S2 | Intensive | No  | 23  | 55  | 89   | 109  | 19   | 18  | 1694 | 531  | 67  | 706  | 125812 | 84869  | 1625401 |
| Aberdeens. | S3 | Extensive | Yes | 41  | 233 | 538  | 220  | 38   | 16  | 1254 | 891  | 20  | 770  | 113177 | 86198  | 2306635 |
| Aberdeens. | S3 | Extensive | No  | 121 | 97  | 311  | 194  | 13   | 26  | 786  | 294  | 9   | 639  | 224357 | 91535  | 2127363 |
| Aberdeens. | S3 | Intensive | Yes | 75  | 81  | 345  | 76   | 25   | 2   | 454  | 545  | 31  | 1991 | 70056  | 69361  | 645380  |
| Aberdeens. | S3 | Intensive | No  | 87  | 19  | 566  | 131  | 1106 | 27  | 656  | 417  | 26  | 1410 | 64260  | 65525  | 1039778 |
| Aberdeens. | S4 | Extensive | Yes | 62  | 133 | 375  | 151  | 5    | 32  | 1398 | 504  | 40  | 993  | 113432 | 84942  | 657331  |
| Aberdeens. | S4 | Extensive | No  | 125 | 89  | 362  | 234  | 15   | 44  | 1690 | 622  | 31  | 1263 | 122521 | 58560  | 812700  |
| Aberdeens. | S4 | Intensive | Yes | 48  | 207 | 195  | 87   | 4    | 3   | 4328 | 1446 | 168 | 3563 | 137858 | 91085  | 956118  |
| Aberdeens. | S4 | Intensive | No  | 88  | 80  | 254  | 120  | 21   | 21  | 3012 | 1075 | 43  | 2133 | 139748 | 81799  | 1159293 |
| Aberdeens. | S5 | Extensive | Yes | 29  | 123 | 144  | 37   | 18   | 19  | 4233 | 698  | 34  | 1619 | 69178  | 78303  | 573671  |
| Aberdeens. | S5 | Extensive | No  | 51  | 66  | 318  | 30   | 33   | 2   | 3291 | 624  | 59  | 706  | 88109  | 81041  | 334641  |
| Aberdeens. | S5 | Intensive | Yes | 111 | 187 | 492  | 31   | 7    | 1   | 2908 | 1598 | 103 | 2047 | 111210 | 96532  | 382447  |
| Aberdeens. | S5 | Intensive | No  | 95  | 167 | 394  | 258  | 83   | 3   | 2182 | 1112 | 49  | 1454 | 162940 | 108947 | 848555  |
| Yorkshire  | S1 | Extensive | Yes | 78  | 147 | 794  | 129  | 6    | 15  | 2070 | 1012 | 20  | 1939 | 91442  | 91718  | 1159293 |
| Yorkshire  | S1 | Extensive | No  | 291 | 75  | 1513 | 552  | 24   | 15  | 1466 | 790  | 43  | 1575 | 95714  | 94054  | 1195148 |
| Yorkshire  | S1 | Intensive | Yes | 116 | 130 | 303  | 140  | 6    | 50  | 1051 | 998  | 66  | 1782 | 62656  | 89158  | 1099536 |
| Yorkshire  | S1 | Intensive | No  | 334 | 146 | 383  | 19   | 29   | 56  | 1772 | 1338 | 40  | 1474 | 93221  | 103615 | 1254905 |
| Yorkshire  | S2 | Extensive | Yes | 73  | 50  | 782  | 249  | 9    | 14  | 791  | 739  | 40  | 1341 | 45051  | 64671  | 1918212 |
| Yorkshire  | S2 | Extensive | No  | 112 | 43  | 482  | 267  | 15   | 11  | 689  | 588  | 27  | 1018 | 33987  | 57570  | 2258829 |
| Yorkshire  | S2 | Intensive | Yes | 92  | 103 | 443  | 103  | 6    | 75  | 849  | 903  | 58  | 1252 | 33202  | 54303  | 1266856 |
| Yorkshire  | S2 | Intensive | No  | 113 | 76  | 133  | 17   | 24   | 35  | 745  | 672  | 25  | 861  | 40219  | 62911  | 627691  |
| Yorkshire  | S3 | Extensive | Yes | 101 | 132 | 460  | 236  | 6    | 14  | 1364 | 1071 | 48  | 1525 | 130939 | 95172  | 1936139 |
| Yorkshire  | S3 | Extensive | No  | 235 | 153 | 607  | 661  | 20   | 11  | 967  | 795  | 70  | 2256 | 91426  | 104591 | 2653227 |
| Yorkshire  | S3 | Intensive | Yes | 110 | 70  | 613  | 461  | 11   | 64  | 554  | 321  | 32  | 734  | 63786  | 65664  | 1900285 |
| Yorkshire  | S3 | Intensive | No  | 161 | 125 | 586  | 69   | 40   | 49  | 758  | 915  | 26  | 1577 | 40771  | 55707  | 1924188 |
| Yorkshire  | S4 | Extensive | Yes | 261 | 183 | 711  | 87   | 17   | 59  | 2336 | 805  | 84  | 1537 | 71387  | 60428  | 3071529 |
| Yorkshire  | S4 | Extensive | No  | 340 | 104 | 672  | 83   | 33   | 51  | 2786 | 645  | 78  | 1249 | 85796  | 74629  | 2366392 |
| Yorkshire  | S4 | Intensive | Yes | 296 | 115 | 983  | 202  | 16   | 404 | 3033 | 1100 | 89  | 1675 | 22813  | 34110  | 2067605 |
| Yorkshire  | S4 | Intensive | No  | 401 | 87  | 745  | 320  | 61   | 201 | 2359 | 2721 | 32  | 1510 | 34547  | 38545  | 1266856 |
| Yorkshire  | S5 | Extensive | Yes | 349 | 67  | 1013 | 747  | 16   | 3   | 4974 | 603  | 107 | 1040 | 18182  | 18885  | 2533713 |
| Yorkshire  | S5 | Extensive | No  | 855 | 82  | 215  | 1752 | 48   | 2   | 5259 | 731  | 66  | 732  | 21556  | 25633  | 2987869 |
| Yorkshire  | S5 | Intensive | Yes | 182 | 171 | 735  | 253  | 38   | 20  | 1796 | 1102 | 64  | 2018 | 58054  | 82898  | 800749  |

|           |    |           |    |     |    |     |    |     |     |      |      |    |      |       |       |         |
|-----------|----|-----------|----|-----|----|-----|----|-----|-----|------|------|----|------|-------|-------|---------|
| Yorkshire | S5 | Intensive | No | 611 | 75 | 623 | 33 | 112 | 116 | 1542 | 1935 | 68 | 2423 | 55733 | 77067 | 1027827 |
|-----------|----|-----------|----|-----|----|-----|----|-----|-----|------|------|----|------|-------|-------|---------|

Trophic species abbreviations: Pred mites, predatory mites; Pred. nem, predaceous nematodes; D microart., detritivorous microarthropods such as collembola, insect larvae or mites; PF feeders, root feeders such as aphids, some insect larvae or some mites; PP nem, plant parasitic or feeder nematodes; OMN nem, omnivorous nematodes; F nem, fungivorous nematodes; B nem, bacterivorous nematodes;

## Table S2

Linear mixed effect model (with gaussian error distribution) to test the effect of Management (two levels: intensive and extensive), Drought (two levels: control vs drought), and their interaction on soil moisture. We averaged the plot level data across the four sampling times to match the data with the soil food web model, which integrates the response of soil biota over the four sampling in times following the release of the perturbation. The factor “Region” was treated as “random” to account for regional variation in climate and soil. The distance between the experimental sites in each region was such that we could not detect any spatial autocorrelation patterns in the data and we did therefore not need to introduce auto-correlation functions in the model. We detected some heterogeneous variance in the interaction between drought and management and we explicitly modelled that heterogeneity rather than transforming the data to meet the assumption of homogeneity. The fixed part of the model returned the following estimates:

Fixed effects: Moisture ~ Drought + Management + Drought:Management

|                   | Value  | Std.Error | DF | t-value | p-value |
|-------------------|--------|-----------|----|---------|---------|
| control-extensive | 47.20  | 6.65      | 54 | 7.10    | 0.0000  |
| drought           | -13.65 | 4.12      | 54 | -3.31   | 0.0016  |
| intensive         | 2.38   | 3.31      | 54 | 0.72    | 0.4752  |
| drought:intensive | 3.47   | 5.14      | 54 | 0.68    | 0.5023  |

These results indicate an average reduction of approximately 30% over the two months following the removal of the shelters. It also shows no detectable effect of management on soil moisture, neither detectable interaction.

**Table S3.** As Table S2 but with Ecosystem respiration as response variable

| Fixed effects: Moisture ~ Drought + Management + Drought:Management |       |           |    |         |         |
|---------------------------------------------------------------------|-------|-----------|----|---------|---------|
|                                                                     | Value | Std.Error | DF | t-value | p-value |
| control-extensive                                                   | 3.57  | 0.23      | 54 | 15.63   | 0.0000  |
| drought                                                             | -0.79 | 0.20      | 54 | -3.89   | 0.0003  |
| intensive                                                           | 0.55  | 0.27      | 54 | 2.01    | 0.0490  |
| drought:intensive                                                   | -0.02 | 0.34      | 54 | -0.06   | 0.9542  |

These results indicate an average reduction of approximately 22% over the two months following the removal of the shelters. It also shows a detectable effect of management, with intensive management increasing respiration of approximately 15%.

### **Benchmarking of estimated total food web fluxes and ecosystem respiration.**

#### *Food web fluxes*

Our estimates of the total flux through the soil food web (i.e. from the basal microbes and roots to the top predaceous mites and nematodes), varied from approximately 250 to 1600 J h<sup>-1</sup> m<sup>-2</sup>. These estimates do not include the energy entering the microbes through the detritus and are likely missing some important contribution from neglected groups such as protists, which are only indirectly accounted for within the fluxes of their nematode consumers. On average, however, the total flux observed equals 640 J h<sup>-1</sup> m<sup>-2</sup> (at a soil depth between 0 and 10cm) and this is in line with previous estimates of soil food web fluxes. For example, for a similar food web in American grassland (Andrés et al., 2016) total fluxes around 700 J h<sup>-1</sup> m<sup>-2</sup> have been estimated. In a different types of soil food web but with very similar methods of flux estimate Potapov et al. (2019) presented total flux estimates in the order of 800 J h<sup>-1</sup> m<sup>-2</sup>. Although direct comparisons are not currently easy to conduct because of differences in units of measurements and scale of sampling, and also differences in how the food web are assembled functionally (e.g. definition of trophic groups), our comparisons suggest that our estimates are within the order of magnitude expected for soil food webs. Assuming a conversion coefficient for units of J to units of C as recommended by Peters (1983), that is 1 kg fresh mass = 7 × 10<sup>6</sup> J, we can then express our average fluxes as approximately 0.25 Kg C yr<sup>-1</sup> m<sup>-2</sup>. Potentially, this type of conversion into units of C, while relaying on some simplistic assumptions, still allow a first estimate of ratios between the fluxes of C estimated within the food web and the fluxes of C measured directly as ecosystem respiration.

**Table S4.** The full output of the SEM graphically presented in Figure 4 is provided below:

Regressions:

|                       | Estimate | Std.Err | z-value | P(> z ) | Std.lv | Std.all |
|-----------------------|----------|---------|---------|---------|--------|---------|
| Soil properties ~     |          |         |         |         |        |         |
| Location              | 1.000    | 0.085   | 11.804  | 0.000   | 1.000  | 0.820   |
| Intensive Management  | 0.385    | 0.138   | 2.797   | 0.005   | 0.385  | 0.194   |
| Soil Moisture ~       |          |         |         |         |        |         |
| Drought               | -0.764   | 0.181   | -4.232  | 0.000   | -0.764 | -0.392  |
| Soil properties       | 0.568    | 0.091   | 6.235   | 0.000   | 0.568  | 0.577   |
| Food Web Total flux ~ |          |         |         |         |        |         |
| Soil Moisture         | -0.283   | 0.164   | -1.730  | 0.084   | -0.283 | -0.277  |
| Soil properties       | -0.230   | 0.150   | -1.534  | 0.125   | -0.230 | -0.229  |
| Drought               | -0.340   | 0.261   | -1.303  | 0.192   | -0.340 | -0.171  |
| Intensive Management  | 0.424    | 0.233   | 1.817   | 0.069   | 0.424  | 0.213   |
| Entropy ~             |          |         |         |         |        |         |
| Food Web Total flux   | 0.406    | 0.093   | 4.378   | 0.000   | 0.406  | 0.408   |
| Soil Moisture         | -0.493   | 0.094   | -5.240  | 0.000   | -0.493 | -0.488  |
| Return Time ~         |          |         |         |         |        |         |
| Food Web Entropy      | -0.442   | 0.116   | -3.809  | 0.000   | -0.442 | -0.441  |
| Total Respiration ~   |          |         |         |         |        |         |
| Drought               | -0.854   | 0.227   | -3.762  | 0.000   | -0.854 | -0.431  |
| Soil Properties       | 0.211    | 0.131   | 1.613   | 0.107   | 0.211  | 0.212   |
| Soil Moisture         | 0.116    | 0.161   | 0.720   | 0.471   | 0.116  | 0.114   |
| Food Web Total flux   | 0.191    | 0.125   | 1.525   | 0.127   | 0.191  | 0.192   |
| Entropy               | 0.096    | 0.145   | 0.661   | 0.509   | 0.096  | 0.096   |
| Intensive Management  | 0.511    | 0.206   | 2.483   | 0.013   | 0.511  | 0.250   |



#### Variances:

|                      | Estimate | Std.Err | z-value | P(> z ) | Std.lv | Std.all |
|----------------------|----------|---------|---------|---------|--------|---------|
| Soil properties      | 0.537    | 0.098   | 5.477   | 0.000   | 0.537  | 0.546   |
| Soil Moisture        | 0.489    | 0.089   | 5.477   | 0.000   | 0.489  | 0.514   |
| Food Web Total flux  | 0.785    | 0.143   | 5.477   | 0.000   | 0.785  | 0.792   |
| Entropy              | 0.459    | 0.084   | 5.477   | 0.000   | 0.459  | 0.470   |
| Return Time          | 0.791    | 0.144   | 5.477   | 0.000   | 0.791  | 0.805   |
| Total Respiration    | 0.579    | 0.106   | 5.477   | 0.000   | 0.579  | 0.591   |
| Location             | 0.661    | 0.121   | 5.477   | 0.000   | 0.661  | 1.000   |
| Drought              | 0.250    | 0.046   | 5.477   | 0.000   | 0.250  | 1.000   |
| Intensive management | 0.250    | 0.046   | 5.477   | 0.000   | 0.250  | 1.000   |

#### R-Square:

|                     | Estimate |
|---------------------|----------|
| Soil properties     | 0.71     |
| Soil Moisture       | 0.49     |
| Food Web Total flux | 0.21     |
| Entropy             | 0.53     |
| Return Time         | 0.20     |
| Total Respiration   | 0.41     |

This model was fitted to the correlation matrix of the data. We are not reporting estimates of covariances set to zero for obvious reasons (for example, there is obviously no path between location and drought, that both are clearly independent exogenous variables in the model). The final path structure underlying the equations of the regression part of the model was based on the general hypothesis set in Figure 1 of the paper. We needed to consider that the number of observational units limited the number of paths we could fit into a single model (overfitting and degrees of freedom issue), and we thus explored the support for alternative paths that are not included in the final model but that could have been possible. For example, we found very little support for including direct paths from the Location variable (a composite of Latitude and Longitude) to the soil food web metrics and total respiration, as that spatial effect was, not surprisingly, most parsimoniously described by the effects that location has on soil variables. Indeed, the three regions in the south and north of England and in Scotland were selected to maximize environmental gradients across experimental units. Soil moisture is positioned between the food web metrics variables and the exogenous variables (Location, Drought, Soil). This corresponds to our

hypothesis that soil environmental gradients, location and rain-out shelters (“drought”) all affected Soil Moisture, and soil moisture then affected the food web and total respiration. Drought, however, could have non soil moisture related effects but models with direct paths from drought to food web metrics and soil respiration received very little support and were discarded.

### **Food web parameters, and computer code to estimate fluxes and network entropy**

We provide an exemplar data set of one particular food web and the original Python code to estimate food web fluxes according to the equation we present in the method of the main article. The code can be run using the file “Example.py”, which calls the python module (that is the computing functions) in the file “Mass\_Balance.py”. There are two files in input: one with the topology of the web (topology.txt) and another (info\_for\_example.csv) that lists the biomass of all trophic species (the example is based on S1, in Devon, drought, that is row one of Table S1), the “metabolism” (metabolic rate per unit of biomass), the death rate, and the efficiency. The death rates and efficiency are based on Moore & de Ruiter (2012) as we have not found specific evidence to support other particular choices and we thus went for values widely accepted by soil food web modellers. The computer routine will return a matrix of fluxes for every links in the food web. The sum of the fluxes will equal the total flux in the food web. The units of the biomass and rates in input are such that fluxes will be returned in units of  $\text{J h}^{-1} \text{m}^{-2}$  but the computer code per se does not determine the final units (the units of the input determine the units of the output).

The computer code will also return the Jacobian of the underlying population dynamics, which can be used to compute the Return Time metrics as per the methods described in the main article. Briefly, one calculate the eigenvalues of the Jacobian, extract the dominant one, and takes the real part of that one to estimate the return time. Therefore, for future applications, the user will need to estimate the biomass of the trophic species in their food web, and the metabolic loss per units of biomass (using metabolic scaling, for example). The user can then measure death rates and efficiencies or choose some of the options available in the literature from previous studies for those rates. With these parameters, and a measurement of population densities, future users can use our code to estimate energy fluxes and the Jacobian of the underlying population dynamics of the nodes in the food web.

## References

- Andrés, P., Moore, J. C., Simpson, R. T., Selby, G., Cotrufo, F., Denef, K., Haddix, M. L., Shaw, E. A., de Tomasel, C. M., & Molowny-Horas, R. (2016). Soil food web stability in response to grazing in a semi-arid prairie: The importance of soil textural heterogeneity. *Soil Biology and Biochemistry*, 97, 131–143.
- Caruso, T., & Migliorini, M. (2009). Euclidean geometry explains why lengths allow precise body mass estimates in terrestrial invertebrates: The case of oribatid mites. *Journal of Theoretical Biology*, 256(3), 436–440.  
<https://doi.org/10.1016/j.jtbi.2008.09.033>
- Chomel, M., Lavallee, J. M., Alvarez-Segura, N., de Castro, F., Rhymes, J. M., Caruso, T., de Vries, F. T., Baggs, E. M., Emmerson, M. C., & Bardgett, R. D. (2019). Drought decreases incorporation of recent plant photosynthate into soil food webs regardless of their trophic complexity. *Global Change Biology*, 25(10), 3549–3561.
- Lavallee, J. M., Chomel, M., Alvarez Segura, N., De Castro, F., Goodall, T., Magilton, M., Rhymes, J. M., Delgado-Baquerizo, M., Griffiths, R. I., & Baggs, E. (2024). Land management shapes drought responses of dominant soil microbial taxa across grasslands. *Nature Communications*, 15(1), 29.
- Moore, J. C., & de Ruiter, P. C. (2012). *Energetic food webs: An analysis of real and model ecosystems*. OUP Oxford.

- Potapov, A. M., Klarner, B., Sandmann, D., Widyastuti, R., & Scheu, S. (2019). Linking size spectrum, energy flux and trophic multifunctionality in soil food webs of tropical land-use systems. *Journal of Animal Ecology*, 88(12), 1845–1859.
- Peters, R.H. (1983). The ecological implications of body size. *Cambridge Studies in Ecology*, 235–238.
- Turnbull, M. S., George, P. B., & Lindo, Z. (2014). Weighing in: Size spectra as a standard tool in soil community analyses. *Soil Biology and Biochemistry*, 68, 366–372.
- Van Den Hoogen, J., Geisen, S., Routh, D., Ferris, H., Traunspurger, W., Wardle, D. A., De Goede, R. G., Adams, B. J., Ahmad, W., & Andriuzzi, W. S. (2019). Soil nematode abundance and functional group composition at a global scale. *Nature*, 572(7768), 194–198.
